# Supplementary material for: Spectral properties and luminescence mechanism of red emitting BCNO phosphors
Source: Royal Society of Chemistry journal article supplement (doi:10.1039/c5ra07054f), 2015-01-01
Supplement: c5ra07054f1.pdf [file c5ra07054f1.pdf]

## Spectral properties and luminescence mechanism of red emitting BCNO phosphors

Xinghua Zhang <sup>a,b,\*</sup>, Xiaobo Jia <sup>a,b</sup>, Hui Liu <sup>a,b</sup>, Zunming Lu <sup>a,b</sup>, Xiaokai Ma <sup>a</sup>, Fanbin Meng <sup>a,b</sup>, Jianling Zhao <sup>a,b</sup>, and Chengchun Tang <sup>a,b</sup>

<sup>a</sup> School of Materials Science and Engineering, Hebei University of Technology, Tianjin, China.

<sup>b</sup> Key Laboratory of Micro- and Nano-scale Boron Nitride Materials of Hebei Province.

\* E-mail: xinghua146@aliyun.com; Tel: +86 022-60204805; Fax: +86 022-60202660.

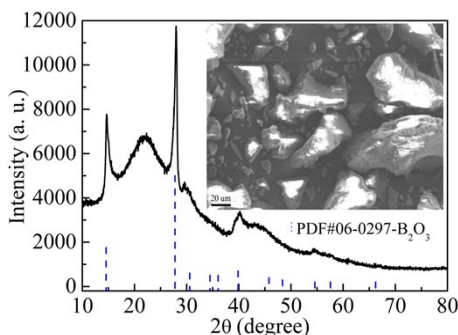

Fig. S1. XRD pattern and SEM image of BCNO phosphor sintered at 650 °C for 12 with  $R_{B/H}=1:1$ .

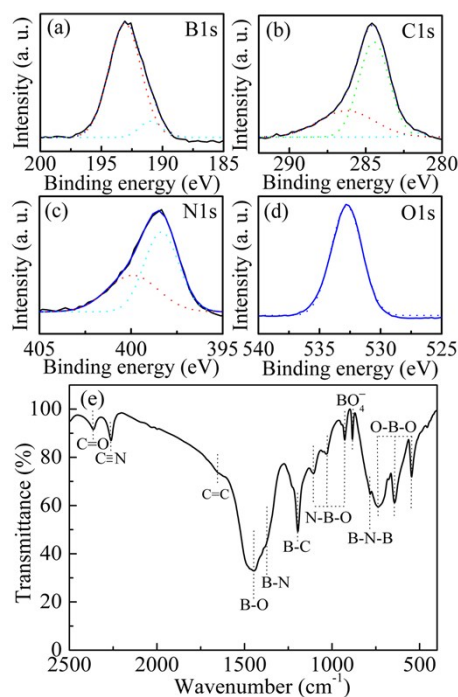

Fig. S2. XPS spectra with fitted curves for (a) B1s, (b) C 1s, (c) N1s, (d) O1s, and (e) FTIR spectrum of BCNO phosphor prepared at 650 °C for 12 h with  $R_{B/H}=1:1$ .
